# Supplementary material for: Identification of risk areas for arboviruses transmitted by Aedes aegypti in northern Brazil: A One Health analysis
Source: PubMed Central journal article supplement — One Health. 2023 Feb 6;16:100499. doi: 10.1016/j.onehlt.2023.100499 (PMC9945760; doi:10.1016/j.onehlt.2023.100499), 2023-02-06

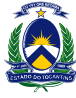

Secretaria da Saúde

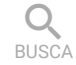

BUSCA

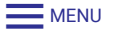

MENU

# Regionalização da Saúde Tocantins - História e Mapas

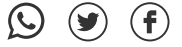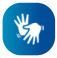

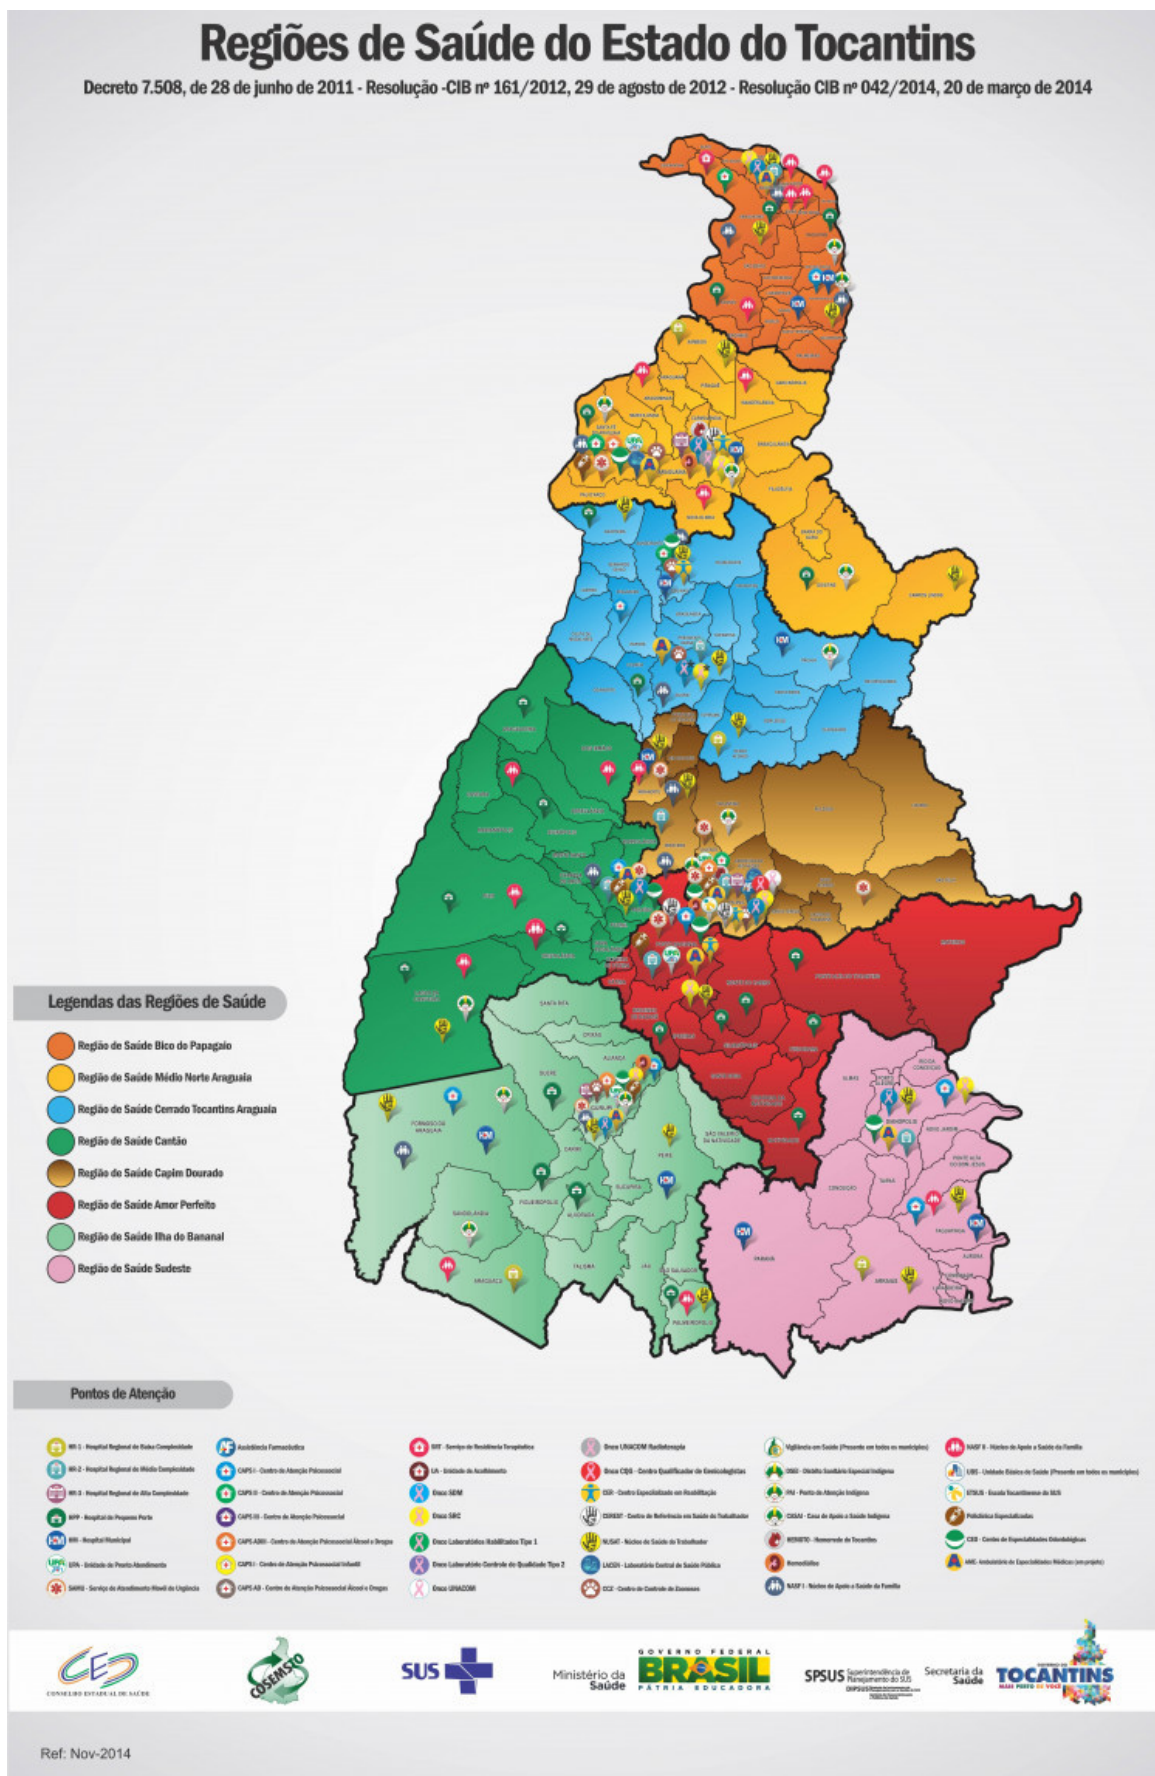

estruturantes. A Regionalização da Saúde é ainda entendida como um “processo de organização das ações e serviços de saúde numa determinada região, visando à universalidade do acesso, a equidade, a integralidade e resolutividade”.

A 1.<sup>a</sup> regionalização no estado ocorreu em 2002 com a Norma Operacional da Assistência a Saúde NOAS 2002, aprovada na CIB – TO, onde se definiu o Plano Diretor de Regionalização – PDR composto por duas macrorregiões Araguaína e Palmas, seis microrregiões.

Em 2006 o Tocantins foi o 1º estado a aderir ao Pacto pela Saúde, reafirmando a cooperação entre as esferas de governo, com a organização das ações e serviços de saúde fundamentada no perfil epidemiológico, sócio econômico e cultural, estabelecendo assim o 2º redesenho da Regionalização das ações e serviços de saúde que operacionalizou por meio da conformação de 15 Regiões de Saúde no ano de 2007. Neste contexto surgem os Colegiados de Gestão Regional – CGR como instâncias de cogestão, redefinindo as Políticas de Saúde no espaço regional.

Nos termos do Decreto n.º 7.508/2011, a Região de Saúde tem a **finalidade de integrar a organização, o planejamento e a execução de ações e serviços de saúde.**

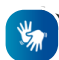

Desta forma foram estabelecidos vários estudos nas reuniões da Câmara Técnica de Gestão da CIB, em articulação com gestores municipais e técnicos do estado, que compuseram o 3º redesenho de Regionalização definindo as novas regiões de saúde passando de **15 para 8**, aprovadas consoante a Resolução CIB-TO Nº 161/2012, através de critérios que definiram o recorte regional, de ações e serviços de saúde mínimos para composição da Região em 05 eixos:

1. **Atenção primária** - 80% de cobertura ESF e suficiência da AB na região;
2. **Urgência e emergência** - 1 Pronto Socorro funcionando 24 hs todos os dias da semana com cirurgia geral e atendimento obstétrico de risco habitual (cesárea) na região;
3. **Atenção psicossocial** - pelo menos 1 CAPS I na região;
4. **Atenção ambulatorial especializada e hospitalar** - atendimento ambulatorial em clínica médica e cirurgia geral e hospitalar nas clínicas médicas, cirúrgicas e obstétricas;
5. **Vigilância em saúde** - equipe de vigilância constituída legalmente no município.

Em 2014 na Resolução CIB-TO Nº 042, de 20 de março de 2014 foi aprovada a mudança do município de Oliveira de Fátima da Região de Saúde Cantão para a Região de Saúde Amor Perfeito.

Nesta proposta de organização das ações e serviços de saúde, o estado do Tocantins vem trabalhando a regionalização da saúde de forma participativa, onde as Comissões Intergestores Regional - CIR têm tido papel fundamental na operacionalização das políticas de saúde.

A Secretaria Estadual de Saúde também tem empenhando esforços no sentido de organizar as Redes de Atenção à Saúde no seu território, como forma de superar a fragmentação dos serviços de saúde implantados e de organizar um sistema que garanta o acesso da população a um serviço de qualidade e em tempo oportuno.

A proposta de implantação/implementação das redes de atenção à saúde em curso no estado tem se deparado com a dificuldade dos municípios em assumirem algumas responsabilidades na organização das redes temáticas, possivelmente pela falta de definição de diretrizes para a descentralização e de um financiamento suficiente para custeio destas unidades, o que ocasiona uma concentração de recursos na gestão estadual.

Concomitante à RAS, o estado do Tocantins, na tentativa de fortalecer a governança regional em relação aos recursos da MAC na região de saúde, está construindo uma proposta de descentralização das ações e serviços ambulatoriais da MAC, que hoje se encontra em plena discussão na Câmara Técnica da CIB, onde pretendemos com esta proposta principalmente:

Promover a capacidade de gestão e operacionalização da saúde nos municípios;

Contribuir para a organização dos serviços de média e alta complexidade ambulatorial nas regiões de saúde, visando à melhoria do acesso da população;

Ofertar serviços de saúde mais próximos dos usuários;

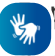 Operar estes desafios e avançar na qualificação da atenção e da gestão em saúde requer forte decisão dos gestores do SUS, enquanto protagonistas do processo de instituir e organizar o sistema de saúde. Essa decisão envolve aspectos técnicos, éticos, culturais, mas, principalmente, implica no cumprimento do pacto político cooperativo entre as instâncias de gestão do Sistema, expresso por uma "associação fina da técnica e da política", para garantir os investimentos e recursos necessários à mudança.

O Tocantins tem buscado soluções para estes desafios, e tem procurado inovar o processo de organização do sistema de saúde, redirecionando suas ações e serviços no desenvolvimento da Rede de Atenção a Saúde – RAS e da descentralização para produzir impacto positivo nos indicadores de saúde da população.

Um dos papéis fundamentais da Secretaria Estadual de Saúde é o de coordenar o processo de implantação do SUS no respectivo Estado. Para tanto, a gestão estadual precisa agir de forma articulada com os demais entes governamentais com os quais divide a competência de prestação da saúde e assistência pública refletida no art. 23, II da Constituição da República Federativa do Brasil - CRFB, bem como com as instâncias de controle social, representadas pelos Conselhos de Saúde e Conferências de Saúde.

Portanto, o Estado do Tocantins tem Plano Diretor de Regionalização - PDR constituído em 8 Regiões de Saúde e suas respectivas Comissões Intergestores Regionais, aprovado na Comissão Intergestores Bipartite – CIB (Resolução CIB Nº. 161, de 29 de agosto de 2012).

Tabela 1 – Regiões de Saúde segundo área, municípios e distância de acesso, Tocantins, 2022.

| Região de Saúde | Macrorregião | Área (km²) | Quant. de Município | População (IBGE censo 2010) | População (IBGE 2021)* | % Pop. do Estado | Distância em Km da Referência Regional |       |       |
|-----------------|--------------|------------|---------------------|-----------------------------|------------------------|------------------|----------------------------------------|-------|-------|
|                 |              |            |                     |                             |                        |                  | Menor                                  | Maior | Média |

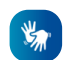

|                            |                                |                   |            |                  |                  |             |           |            |            |
|----------------------------|--------------------------------|-------------------|------------|------------------|------------------|-------------|-----------|------------|------------|
| Capim Dourado              |                                | 29.569,88         | 14         | 301.576          | 389.493          | 24%         | 55        | 336        | 144        |
| Ilha do Bananal            |                                | 53.785,26         | 18         | 171.546          | 186.210          | 12%         | 21        | 268        | 110        |
| Cantão                     | <b>Macrorregião Centro Sul</b> | 41.638,07         | 15         | 114.648          | 132.934          | 8%          | 23        | 248        | 87         |
| Amor Perfeito              |                                | 36.770,94         | 13         | 103.350          | 112.657          | 7%          | 41        | 180        | 90         |
| Sudeste                    |                                | 36.418,80         | 15         | 92.376           | 99.516           | 6%          | 30        | 213        | 111        |
| <b>Soma/ Média</b>         |                                | <b>198.183,94</b> | <b>75</b>  | <b>783.496</b>   | <b>920.810</b>   | <b>57%</b>  | <b>34</b> | <b>249</b> | <b>109</b> |
| Médio Norte Araguaia       |                                | 32.255,06         | 17         | 262.650          | 309.111          | 19%         | 36        | 297        | 95         |
| Bico do Papagaio           | <b>Macrorregião Norte</b>      | 14.128,75         | 24         | 191.094          | 212.951          | 13%         | 16        | 158        | 79         |
| Cerrado Tocantins Araguaia |                                | 32.872,01         | 23         | 146.205          | 164.491          | 10%         | 51        | 210        | 108        |
| <b>Soma/ Média</b>         |                                | <b>79.256,82</b>  | <b>64</b>  | <b>599.949</b>   | <b>686.553</b>   | <b>43%</b>  | <b>34</b> | <b>222</b> | <b>94</b>  |
| <b>Total</b>               |                                | <b>277.438,76</b> | <b>139</b> | <b>1.383.445</b> | <b>1.607.363</b> | <b>100%</b> | <b>-</b>  |            |            |

Fonte: IBGE - Disponível em: <https://www.ibge.gov.br/estatisticas/sociais/populacao/9103-estimativas-de-populacao.html?=&t=resultados> - acesso em 04/10/2021. \* Estimativa populacional IBGE 2021.

As Macrorregiões de Saúde foram definidas a partir de estudos debatidos na Câmara Técnica da CIB-TO e área técnica da SES-TO no 2º quadrimestre de 2018, que propuseram como ponto de corte para sua conformação:

Na Oncologia: Quimioterapia (ambulatorial e hospitalar); Radioterapia (ambulatorial e hospitalar); Cirurgia Oncológica;

A Cardiologia: Cirurgia Cardíaca

**Materno Infantil: Parto de Alto Risco**

UTI Neonatal tipo II - Recém-nascido grave ou potencialmente grave e Leitos de UCINCO e UCINCA.

A Conformação de 2 (duas) Macrorregiões de Saúde no Estado do Tocantins: **Macrorregião Norte e Macrorregião Centro Sul** foi aprovada pela Resolução CIB/TO Nº. 143, de 19 de julho de 2018. Os mapas das macrorregiões de saúde estão disponíveis em: <https://www.to.gov.br/saude/regionalizacao-da-saude-tocantins-historia-e-mapas/468kh0pycna2>

O Estado é composto por 139 municípios onde 49% deles possuem menos de 5.000 habitantes. No geral, 93% possuem população inferior a 20.000 habitantes, o que afeta o processo de organização das estruturas de saúde.

Tabela 2 – Distribuição populacional por faixa e quantidade de municípios, Tocantins, 2022.

|                                                                                  | Faixa Pop    | Quant. Mun. | Percentual  |            |
|----------------------------------------------------------------------------------|--------------|-------------|-------------|------------|
| 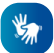 | <5mil        | 68          | 49%         |            |
|                                                                                  | 5 a 10 mil   | 42          | 30%         | <b>93%</b> |
|                                                                                  | 10 a 20 mil  | 19          | 14%         |            |
|                                                                                  | 20 a 30 mil  | 3           | 2%          |            |
|                                                                                  | 30 a 90 mil  | 5           | 4%          |            |
|                                                                                  | > 100 mil    | 2           | 1%          | <b>7%</b>  |
|                                                                                  | <b>TOTAL</b> | <b>139</b>  | <b>100%</b> |            |

Fonte: IBGE - Disponível em: <https://www.ibge.gov.br/estatisticas/sociais/populacao/9103-estimativas-de-populacao.html?=&t=resultados> - acesso em 04/10/2021.

## 📁 Arquivos

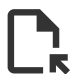

**Distâncias nas Regiões Saúde Tocantins.xlsx**

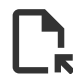

Mapa Macrorregiões de Saúde Tocantins

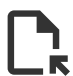

Mapa do Tocantins com as 8 Regiões de Saúde-2015.pdf

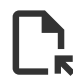

Mapa do Tocantins com as 8 Regiões de Saúde e Pontos de Atenção-2015.pdf

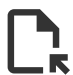

Mapas das 8 Regiões de Saúde com Ponto de Atenção-2015.pdf

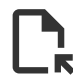

Distribuição dos Municípios por Regiões de Saúde e Macrorregiões.xls

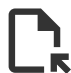

Distribuição dos Municípios por Regiões de Saúde Tocantins.docx

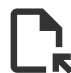

Pop Residente por Região de Saúde 2013.pdf

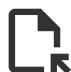

Folder: A Regionalização.pdf

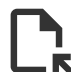

Distância dos Municípios para a referência na Região de Saúde.docx

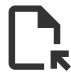

Mapa Macrorregião de Saúde Centro Sul e Macrorregião Norte-Tocantins

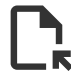

Distância dos municípios para Palmas-Capital.pdf

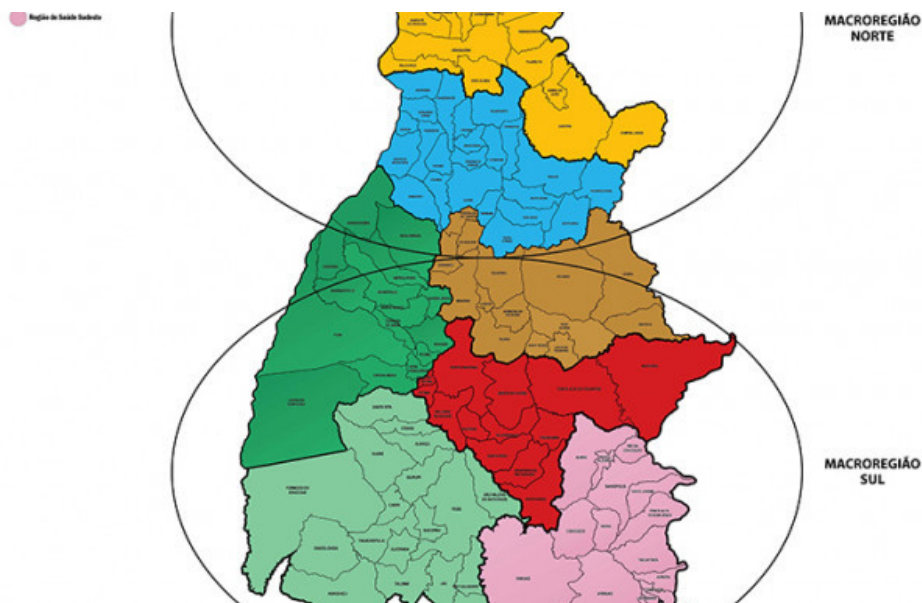

- Adao Nilson Alves Freitas [↓](#)

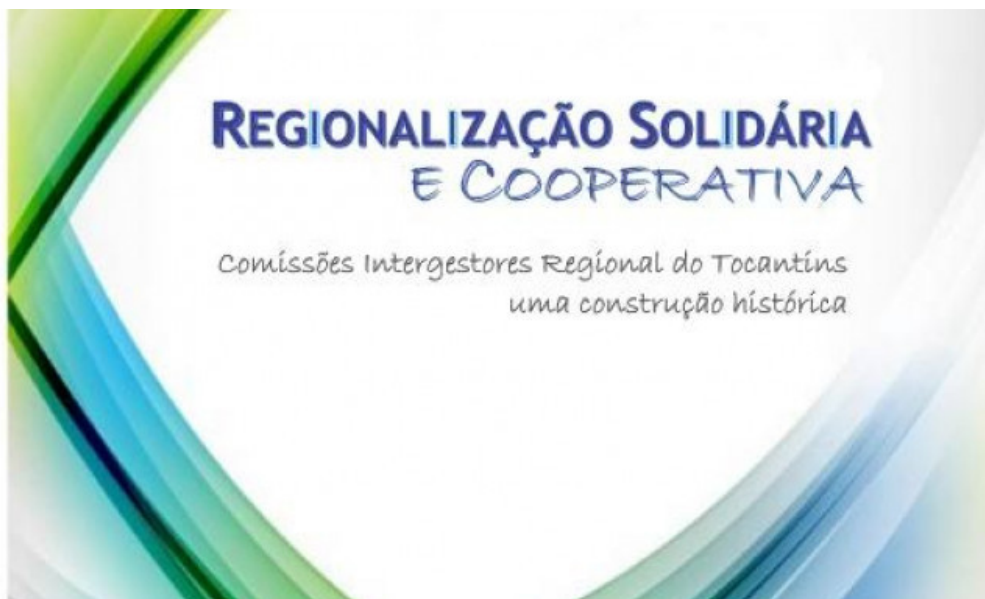

[↓](#)

[↔](#) Mapa da Região de Saúde Bico do papagaio

[↔](#) Mapa da Região de Saúde Médio Norte Araguaia

[↔](#) Mapa da Região de Saúde Cerrado Tocantins Araguaia

[↔](#) Mapa da Região de Saúde Cantão

[↔ Mapa da Região de Saúde Capim Dourado](#)[↔ Mapa da Região de Saúde Amor Perfeito](#)[↔ Mapa da Região de Saúde Ilha do Bananal](#)[↔ Mapa da Região de Saúde Sudeste](#)[↔ Logo\\_Regionalização e CIR](#)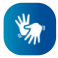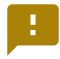

ACESSO À  
INFORMAÇÃO

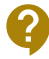

SERVIÇO DE  
INFORMAÇÃO  
AO CIDADÃO

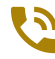

OUVIDORIA

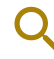

PORTAL DA  
TRANSPARÊNCIA

**TOCANTINS**  
GOVERNO DO ESTADO

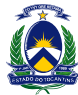

Desenvolvido  
por

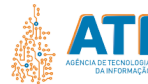

Supplement: mmc1.pdf [file mmc1.pdf]
